# Supplementary material
Source: publisher figshare collection journal article supplement (https://tandf.figshare.com/ndownloader/files/42613681)
Supplement: Supplementary file 1 [file 42613681]

| **YY/MM/DD** | **Min(mm)** | **Max(mm)** | **Mean(mm)** | **YY/MM/DD** | **Min(mm)** | **Max(mm)** | **Mean(mm)** |
| --- | --- | --- | --- | --- | --- | --- | --- |
| 2020/9/20 | -28.15 | 26.00 | 1.06 | 2021/6/23 | -77.98 | 76.49 | -2.45 |
| 2020/10/20 | -25.35 | 19.66 | 0.89 | 2021/7/5 | -83.79 | 89.67 | -2.93 |
| 2020/10/14 | -27.41 | 40.82 | 0.79 | 2021/7/17 | -83.22 | 105.21 | -3.18 |
| 2020/10/26 | -28.64 | 25.46 | 1.03 | 2021/7/29 | -82.43 | 100.38 | -3.16 |
| 2020/11/7 | -35.96 | 26.04 | 0.76 | 2021/8/10 | -82.59 | 99.67 | -3.22 |
| 2020/11/19 | -29.42 | 32.57 | 0.68 | 2021/8/22 | -83.66 | 97.74 | -3.49 |
| 2020/12/1 | -31.21 | 42.29 | 0.69 | 2021/9/3 | -85.34 | 95.14 | -3.60 |
| 2020/12/13 | -33.82 | 45.65 | 0.63 | 2021/9/15 | -84.64 | 96.47 | -3.61 |
| 2020/12/25 | -30.16 | 48.63 | 0.51 | 2021/9/27 | -85.03 | 96.24 | -3.54 |
| 2021/1/6 | -29.92 | 54.35 | 0.46 | 2021/10/9 | -85.29 | 97.44 | -3.71 |
| 2021/1/18 | -30.67 | 56.64 | 0.32 | 2021/10/21 | -85.65 | 97.69 | -3.89 |
| 2021/1/30 | -34.75 | 58.65 | -0.36 | 2021/11/2 | -86.05 | 100.30 | -3.95 |
| 2021/2/11 | -38.57 | 69.11 | -0.31 | 2021/11/14 | -104.43 | 101.97 | -4.01 |
| 2021/2/23 | -38.06 | 60.89 | -0.47 | 2021/11/26 | -95.48 | 100.58 | -4.26 |
| 2021/3/7 | -36.92 | 61.92 | -0.59 | 2021/12/8 | -91.78 | 107.15 | -4.55 |
| 2021/3/19 | -41.61 | 61.92 | -0.72 | 2021/12/20 | -96.25 | 112.59 | -4.73 |
| 2021/3/31 | -37.30 | 63.12 | -0.92 | 2022/1/1 | -92.97 | 120.43 | -4.89 |
| 2021/4/12 | -36.30 | 62.27 | -1.05 | 2022/1/25 | -93.53 | 109.39 | -4.58 |
| 2021/4/24 | -40.09 | 62.87 | -1.01 | 2022/2/6 | -94.82 | 114.20 | -4.49 |
| 2021/5/6 | -40.52 | 57.95 | -1.21 | 2022/2/18 | -95.43 | 119.27 | -5.09 |
| 2021/5/18 | -39.26 | 57.37 | -1.11 | 2022/3/2 | -96.22 | 117.04 | -5.25 |
| 2021/6/11 | -75.56 | 99.11 | -2.24 | 2022/3/14 | -96.32 | 118.17 | -5.59 |

Table SI1 The statistics of cumulative deformation (reference to Sep.08, 2020)


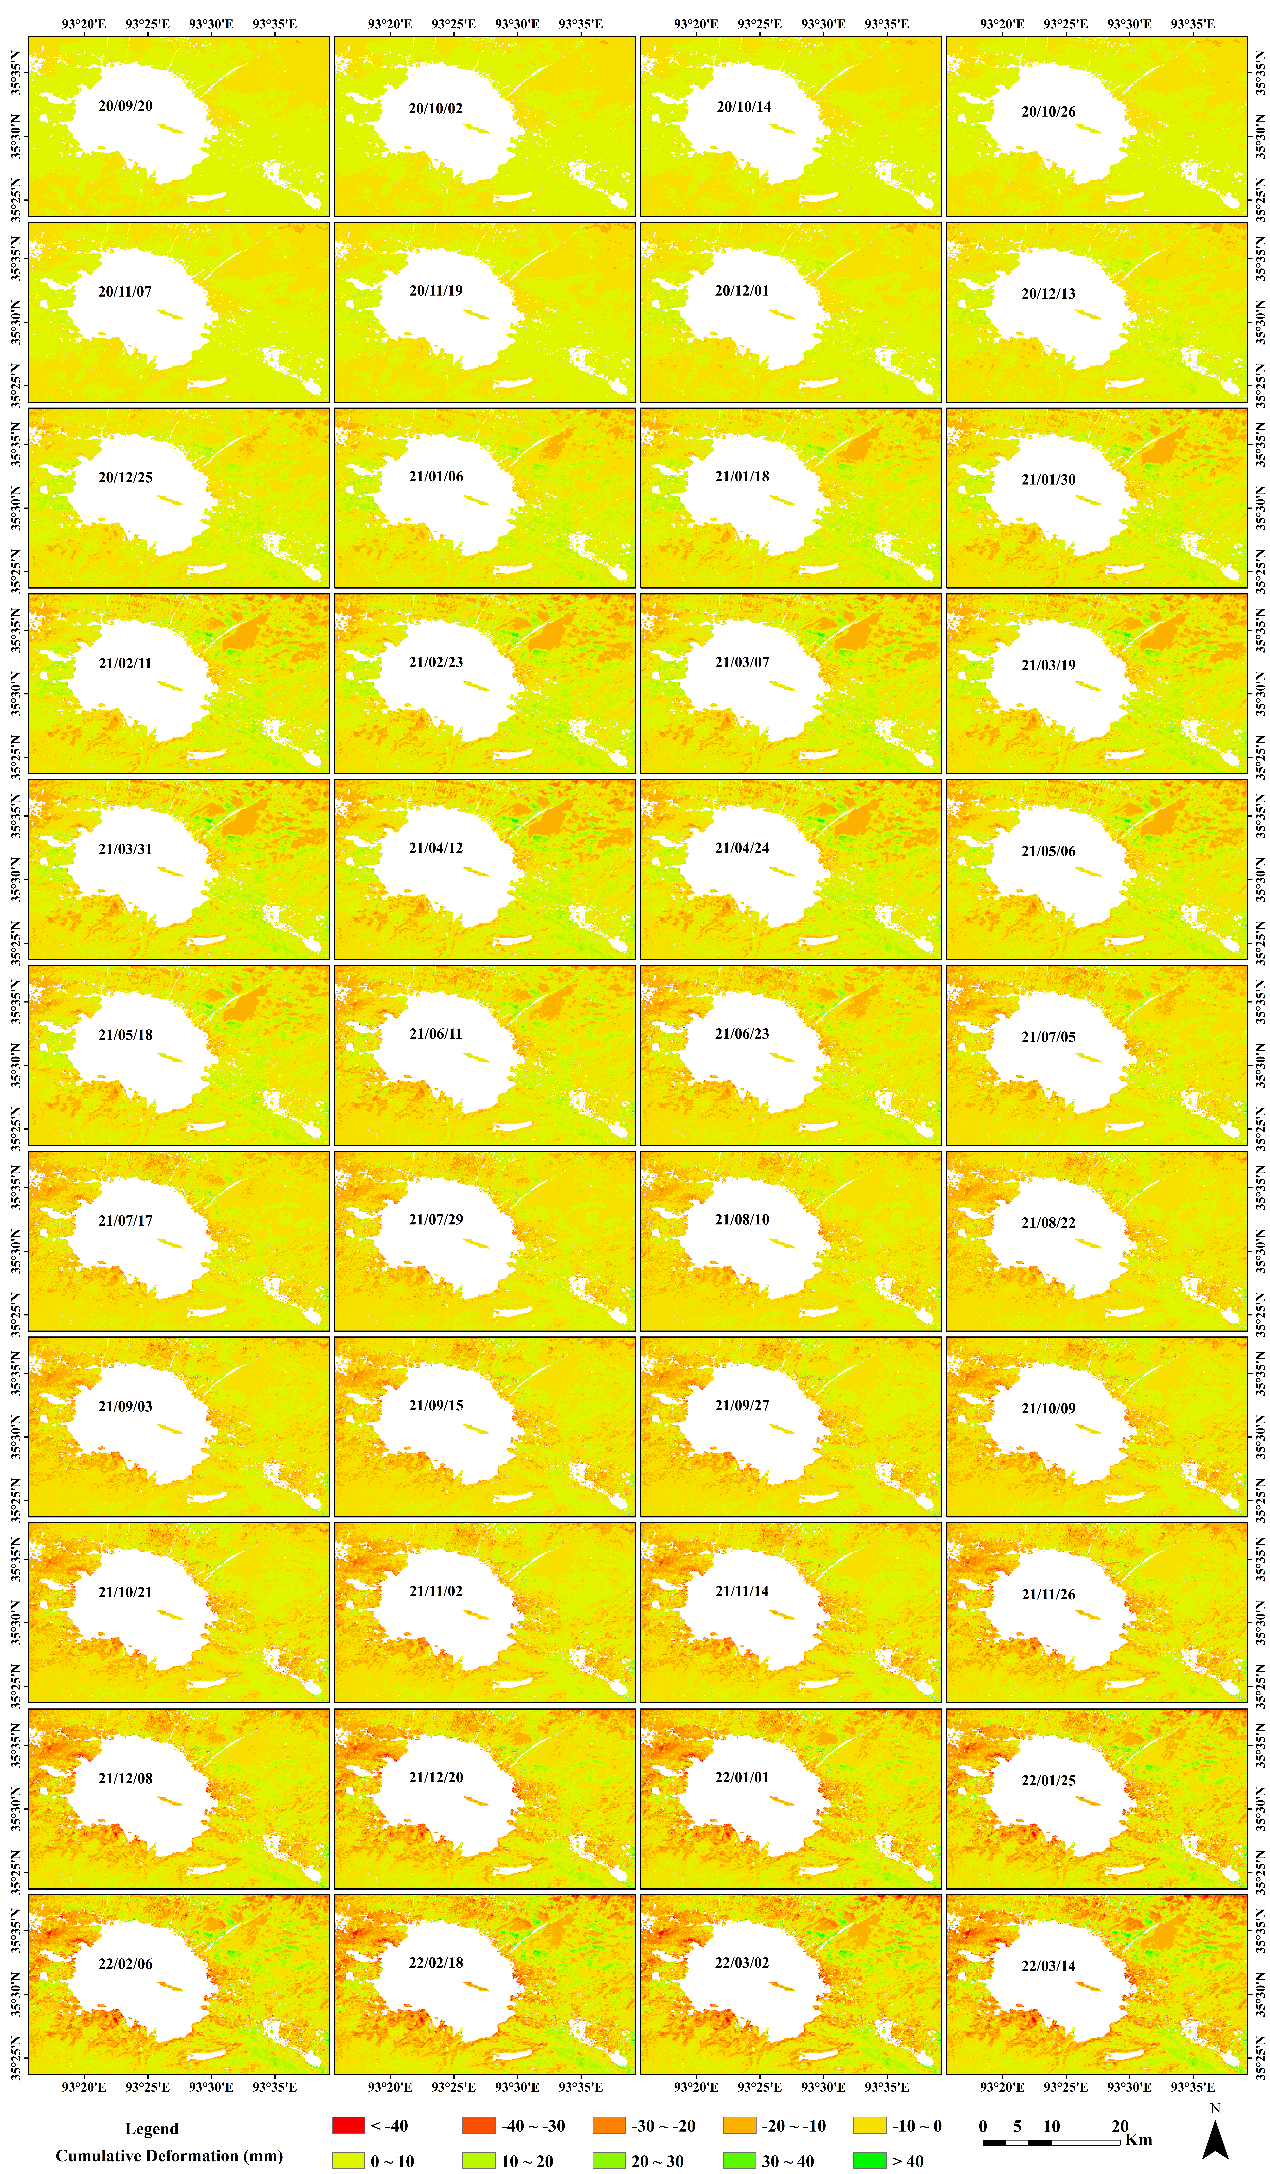


Figure SI1 The cumulative deformation around Salt Lake, with reference to Sep.08, 2020.
